# Supplementary material
Source: Royal Society of Chemistry journal article supplement (doi:10.1039/d6cp00386a)
Supplement: d6cp00386a2.pdf [file d6cp00386a2.pdf]

# Unraveling Prothionamide Solubility Enhancement by Ionic Liquids: From Molecular Screening to Microscopic insights

Xiaowen Sun<sup>a,#</sup>, Junqi Bai<sup>a,#</sup>, Chuanrun Li<sup>a</sup>, Zhigang Lei<sup>b</sup>, Chengmin Gui<sup>c,\*</sup>, Yichun Dong<sup>d</sup>, Xiaoyi Gao<sup>e</sup>, Yanyan Guo<sup>a,\*</sup>

<sup>a</sup>Pharmaceutical Engineering Technology Research Center, School of Pharmacy, Anhui University of Chinese Medicine, Hefei, 230012, China

<sup>b</sup>State Key Laboratory of Chemical Resource Engineering, Beijing University of Chemical Technology, Box 266, Beijing, 100029, China

<sup>c</sup>School of Chemistry & Chemical Engineering, Anhui University, Hefei 230601, China

<sup>d</sup>School of Chemistry and Chemical Engineering, Hefei University of Technology, Hefei 230009, China

<sup>e</sup>Key Laboratory of Pollution Exposure and Health Intervention Technology, Interdisciplinary Research Academy (IRA), Zhejiang Shuren University, Hangzhou 310015, China

---

\*Corresponding author: 24071@ahu.edu.cn; gyybuct@163.com

#These authors contributed equally to this work.

## Contents

### Section 1. Details of MD simulation

**Table S1** IL information.

**Table S2** Restrained electrostatic potential (RESP) charge of different ions of PTO, [DEME][BF<sub>4</sub>], [BMIM][BF<sub>4</sub>], [BMIM][TfO], [EMIM][Tf<sub>2</sub>N] and [EMIM][BF<sub>4</sub>] used in MD simulation.

**Table S3** Restrained electrostatic potential (RESP) charge of different ions of [BMIM][BF<sub>4</sub>] and [DEME][BF<sub>4</sub>] used in MD simulation.

**Table S4** Restrained electrostatic potential (RESP) charge of different ions of [EMIM][Tf<sub>2</sub>N] and [EMIM][BF<sub>4</sub>] used in MD simulation.

**Table S5** Box size and composition of the systems in MD simulation.

**Table S6** Summary of  $\ln\gamma^\infty$  values for screened ionic liquids classified by anion and cation.

**Table S7** Ratio of IC<sub>50</sub> to effective IL concentration in BHK 21 cells.

**Table S8** Ratio of IC<sub>50</sub> to effective concentration of IL in HepG2 cells.

**Table S9** Comparison of Simulated and Experimental Densities for Pure ILs at 338.15 K.

**Fig. S1** The density of five IL-PTO systems calculated from the last 5 ns of the MD simulation trajectory.

**Fig. S2** The solvent-accessible surface area (SASA) of PTO in five IL-PTO systems, calculated from the last 5 ns of the MD simulation trajectory.

**Fig. S3** Time evolution of the number of HBs during the 40 ns MD simulation.

## Section 1. Details of MD simulation

The MD simulations are divided in the following steps:

- (1) The energy was minimized to obtain a reasonable distribution of molecules in the system, where the maximum force in systems will be less than 100 kJ/(mol·nm).
- (2) Under the canonical (NVT) ensemble, the systems were equilibrated for 20 ns accompanying with the time step of 1 fs. The Berendsen thermostat and barostat were used to fix the temperature and pressure, and the coupling constants were 0.2 ps and 1.0 ps.<sup>1,2</sup>
- (3) The systems of the balanced configuration based on the last frame mentioned above under Isobaric-Isothermal (NPT) ensemble was further simulated for 60 ns possessing the time step of 1 fs. The Nose-Hoover<sup>2</sup> with a coupling constant of 0.2 ps and the Parrinello-Rahman barostat<sup>3</sup> with a coupling constant of 4 ps are used to fix the temperature and pressure, respectively. The cutoff distances of the dispersion and Coulombic interactions both are 1.4 nm, and the particle mesh Ewald (PME) method was used to calculate the long-range electrostatic interactions.<sup>4</sup>

The last 5 ns of the trajectory was used for analysis.

## References

- 1 T. Hansson, C. Oostenbrink, and W. F. van Gunsteren, Molecular dynamics simulations, *Curr. Opin. Struc. Biol.*, 2002, **12**, 190–196.
- 2 G. Bussi, D. Donadio and M. Parrinello, Canonical Sampling through Velocity Rescaling, *J. Chem. Phys.*, 2007, **126**, 014101.
- 3 N. Weinberg, E. Edwards, L. Huber, Z. Sentell and J. Spooner, A Newtonian algorithm for constant pressure molecular dynamics with periodic boundary conditions, *Mol. Phys.*, 2022, **120**, 2046–2060.
- 4 M. Parrinello and A. Rahman, Polymorphic Transitions in Single Crystals: A New Molecular Dynamics Method, *J. Appl. Phys.*, 1981, **52**, 7182–7190.

**Table S1** IL information

**(a) Anions information**

| Number | Abbreviation         | Anions name                     | Formula         | Structure |
|--------|----------------------|---------------------------------|-----------------|-----------|
| 1      | Ac                   | acetate                         | $C_2H_3O_2$     |           |
| 2      | DBP                  | dibutylphosphate                | $C_8H_{18}O_4P$ |           |
| 3      | Bza                  | benzoate                        | $C_7H_5O_2$     |           |
| 4      | DMP                  | dimethylphosphate               | $C_2H_6O_4P$    |           |
| 5      | DEP                  | diethylphosphate                | $C_4H_{10}O_4P$ |           |
| 6      | MoeSO <sub>4</sub>   | methoxyethylsulfate             | $C_3H_7O_5S$    |           |
| 7      | MoeoeSO <sub>4</sub> | 2-(2-methoxyethoxy)ethylsulfate | $C_5H_{11}O_6S$ |           |
| 8      | ESO <sub>4</sub>     | ethylsulfate                    | $C_2H_5O_4S$    |           |
| 9      | EoeSO <sub>4</sub>   | ethoxyethylsulfate              | $C_4H_9O_5S$    |           |
| 10     | TFA                  | trifluoroacetate                | $C_2F_3O_2$     |           |

|    |             |                                      |                 |                                                                                       |
|----|-------------|--------------------------------------|-----------------|---------------------------------------------------------------------------------------|
| 11 | Sal         | salicylate                           | $C_7H_5O_3$     | 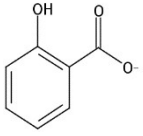   |
| 12 | $MSO_4$     | methylsulfate                        | $CH_3O_4S$      |    |
| 13 | $F_7Bta$    | heptafluorobutanoate                 | $C_4F_7O_2$     |    |
| 14 | DCA         | dicyanamide                          | $C_2N_3$        | $N\equiv C-N^--C\equiv N$                                                             |
| 5  | TfO         | trifluoromethanesulfonate            | $CF_3O_3S$      |   |
| 16 | TCM         | tricyanomethane                      | $C_4N_3$        |  |
| 17 | $BF_4$      | tetrafluoroborate                    | $BF_4$          |  |
| 18 | $Tf_2C$     | bis(trifluoromethylsulfonyl)methane  | $C_3HF_6O_4S_2$ |  |
| 19 | $Tf_2N$     | bis(trifluoromethylsulfonyl)imide    | $C_2F_6NO_4S_2$ |  |
| 20 | $N(CF_3)_2$ | bis(trifluoromethyl)imide            | $C_2F_6N$       |  |
| 21 | TMSC        | tris(trifluoromethylsulfonyl)methide | $C_4F_9O_6S_3$  |  |

|    |     |                  |           |  |
|----|-----|------------------|-----------|--|
| 22 | TCB | tetracyanoborate | $C_4BN_4$ |  |
|----|-----|------------------|-----------|--|

### **(b) Cations information**

| Number | Abbreviation    | ILs name                                  | Formula              | Structure |
|--------|-----------------|-------------------------------------------|----------------------|-----------|
| 1      | DEME            | diethyl-methyl-(2-methoxyethyl)ammonium   | $C_8H_{20}NO$        |           |
| 2      | BIMIM           | 1-butylimidazolium                        | $C_7H_{13}N_2$       |           |
| 3      | HoeMIM          | 1-(2-hydroxyethyl)-3-methylimidazolium    | $C_6H_{11}N_2O$      |           |
| 4      | DDAPS           | dodecyl-dimethyl-3-sulfopropylammonium    | $C_{17}H_{38}NO_3S$  |           |
| 5      | BomBomIM        | 1-butoxymethyl-3-pentoxymethylimidazolium | $C_{14}H_{27}N_2O_2$ |           |
| 6      | $C_{3om}$ BomIM | 1-butoxymethyl-3-propoxymethylimidazolium | $C_{12}H_{23}N_2O_2$ |           |
| 7      | NomMIM          | 1-methyl-3-nonoxymethylimidazolium        | $C_{14}H_{27}N_2O$   |           |
| 8      | $C_{7om}$ MIM   | 1-methyl-3-heptoxymethylimidazolium       | $C_{12}H_{23}N_2O$   |           |

|    |              |                                      |                    |  |
|----|--------------|--------------------------------------|--------------------|--|
| 9  | HomMIM       | 1-hexyloxymethyl-3-methylimidazolium | $C_{11}H_{21}N_2O$ |  |
| 10 | $C_{18}$ MIM | 1-octadecyl-3-methylimidazolium      | $C_{22}H_{43}N_2$  |  |
| 11 | $C_{16}$ MIM | 1-hexadecyl-3-methylimidazolium      | $C_{20}H_{39}N_2$  |  |
| 12 | $C_{14}$ MIM | 1-tetradecyl-3-methylimidazolium     | $C_{18}H_{35}N_2$  |  |
| 13 | $C_{12}$ MIM | 1-dodecyl-3-methylimidazolium        | $C_{16}H_{31}N_2$  |  |
| 14 | DMIM         | 1-decyl-3-methylimidazolium          | $C_{14}H_{27}N_2$  |  |
| 15 | NMIM         | 1-methyl-3-nonylimidazolium          | $C_{13}H_{25}N_2$  |  |
| 16 | OMIM         | 1-octyl-3-methylimidazolium          | $C_{12}H_{23}N_2$  |  |
| 17 | $C_7$ MIM    | 1-heptyl-3-methylimidazolium         | $C_{11}H_{21}N_2$  |  |
| 18 | $C_5$ MIM    | 1-pentyl-3-methylimidazolium         | $C_9H_{17}N_2$     |  |

|    |                       |                                 |                                                |                                                                                       |
|----|-----------------------|---------------------------------|------------------------------------------------|---------------------------------------------------------------------------------------|
| 19 | C <sub>7</sub> MIM    | 1-heptyl-3-methylimidazolium    | C <sub>11</sub> H <sub>21</sub> N <sub>2</sub> | 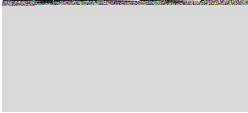   |
| 20 | EMIM                  | 1-ethyl-3-methylimidazolium     | C <sub>6</sub> H <sub>11</sub> N <sub>2</sub>  |    |
| 21 | P <sub>6,6,6,14</sub> | triethyl-tetradecylphosphonium  | C <sub>32</sub> H <sub>68</sub> P              |    |
| 22 | 5MEMIM                | 1-ethyl-3,4-dimethylimidazolium | C <sub>7</sub> H <sub>13</sub> N <sub>2</sub>  |    |
| 23 | 4MEEIM                | 1,3-diethyl-4-methylimidazolium | C <sub>8</sub> H <sub>15</sub> N <sub>2</sub>  |    |
| 24 | HMIM                  | 1-hexyl-3-methylimidazolium     | C <sub>10</sub> H <sub>19</sub> N <sub>2</sub> |  |
| 25 | BMIM                  | 1-butyl-3-methylimidazolium     | C <sub>8</sub> H <sub>15</sub> N <sub>2</sub>  |  |

**Table S2** Restrained electrostatic potential (RESP) charge of different ions of PTO, and [BMIM][TfO] used in MD simulation.

| PTO  |         | [BMIM] <sup>+</sup> |         | [TfO] <sup>-</sup> |         |
|------|---------|---------------------|---------|--------------------|---------|
| atom | charge  | atom                | charge  | atom               | charge  |
| C01  | -0.6407 | C01                 | -0.2181 | C01                | -0.2246 |
| C02  | 0.5194  | C02                 | -0.2301 | N02                | -0.0230 |
| N03  | -0.7327 | N03                 | 0.0966  | C03                | -0.0249 |
| C04  | 0.5766  | C04                 | 0.0765  | N04                | 0.1194  |
| C05  | -0.4563 | N05                 | 0.1601  | C05                | -0.1313 |
| C06  | 0.4649  | C06                 | -0.3439 | C06                | 0.3152  |
| C07  | 0.1087  | C07                 | -0.1665 | C07                | -0.2936 |
| N08  | -0.4353 | C08                 | 0.0992  | C08                | -0.1028 |
| S09  | -0.3631 | C09                 | -0.0328 | H09                | 0.2236  |
| C0A  | -0.0419 | C0A                 | -0.1264 | H0A                | 0.2421  |
| C0B  | 0.3819  | H0B                 | 0.2388  | H0B                | 0.2103  |
| C0C  | -0.4134 | H0C                 | 0.2538  | H0C                | -0.0100 |
| H0D  | 0.2122  | H0D                 | 0.0917  | H0D                | -0.0100 |
| H0E  | 0.0223  | H0E                 | 0.1550  | H0E                | 0.0878  |
| H0F  | 0.1547  | H0F                 | 0.1550  | H0F                | 0.0878  |
| H10  | 0.3047  | H10                 | 0.1550  | H10                | 0.0878  |
| H11  | 0.2162  | H11                 | 0.0799  | H11                | 0.0952  |
| H12  | -0.0007 | H12                 | 0.0799  | H12                | 0.0952  |
| H13  | -0.0007 | H13                 | 0.0213  | H13                | 0.0952  |
| H14  | -0.0839 | H14                 | 0.0213  |                    |         |
| H15  | -0.0839 | H15                 | 0.0276  |                    |         |
| H16  | 0.0906  | H16                 | 0.0276  |                    |         |
| H17  | 0.0906  | H17                 | 0.0388  |                    |         |
| H18  | 0.0906  | H18                 | 0.0388  |                    |         |
|      |         | H19                 | 0.0388  |                    |         |

**Table S3** Restrained electrostatic potential (RESP) charge of different ions of [BMIM][BF<sub>4</sub>] and [DEME][BF<sub>4</sub>] used in MD simulation.

| [BMIM] <sup>+</sup> |         | [BF <sub>4</sub> ] <sup>-</sup> |         | [DEME] <sup>+</sup> |         | [BF <sub>4</sub> ] <sup>-</sup> |         |
|---------------------|---------|---------------------------------|---------|---------------------|---------|---------------------------------|---------|
| atom                | charge  | atom                            | charge  | atom                | charge  | atom                            | charge  |
| C01                 | -0.1887 | B                               | -0.4515 | O01                 | -0.3769 | B                               | -0.4850 |
| C02                 | -0.3405 | F                               | 1.0711  | C02                 | 0.2177  | F                               | 1.0347  |
| N03                 | 0.2447  | F                               | -0.4995 | C03                 | -0.6224 | F                               | -0.4856 |
| C04                 | -0.0430 | F                               | -0.4697 | N04                 | -0.0912 | F                               | -0.4559 |
| N05                 | 0.1335  | F                               | -0.4950 | C05                 | -0.0997 | F                               | -0.4650 |
| C06                 | -0.1978 |                                 |         | C06                 | -0.1650 |                                 |         |
| C07                 | -0.2573 |                                 |         | C07                 | 0.0626  |                                 |         |
| C08                 | 0.0661  |                                 |         | C08                 | -0.4843 |                                 |         |
| C09                 | -0.0566 |                                 |         | C09                 | -0.2223 |                                 |         |
| C0A                 | -0.1894 |                                 |         | C0A                 | 0.2153  |                                 |         |
| H0B                 | 0.2370  |                                 |         | H0B                 | 0.0657  |                                 |         |
| H0C                 | 0.2760  |                                 |         | H0C                 | 0.0657  |                                 |         |
| H0D                 | 0.1903  |                                 |         | H0D                 | 0.2460  |                                 |         |
| H0E                 | 0.1194  |                                 |         | H0E                 | 0.2460  |                                 |         |
| H0F                 | 0.1194  |                                 |         | H0F                 | 0.0946  |                                 |         |
| H10                 | 0.1194  |                                 |         | H10                 | 0.0946  |                                 |         |
| H11                 | 0.1528  |                                 |         | H11                 | 0.0946  |                                 |         |
| H12                 | 0.1528  |                                 |         | H12                 | 0.1427  |                                 |         |
| H13                 | 0.0094  |                                 |         | H13                 | 0.1427  |                                 |         |
| H14                 | 0.0094  |                                 |         | H14                 | 0.1427  |                                 |         |
| H15                 | 0.0621  |                                 |         | H15                 | 0.1756  |                                 |         |
| H16                 | 0.0621  |                                 |         | H16                 | 0.1756  |                                 |         |
| H17                 | 0.0559  |                                 |         | H17                 | 0.1494  |                                 |         |
| H18                 | 0.0559  |                                 |         | H18                 | 0.1494  |                                 |         |
| H19                 | 0.0559  |                                 |         | H19                 | 0.1494  |                                 |         |

**Table S4** Restrainted electrostatic potential (RESP) charge of different ions of [EMIM][Tf<sub>2</sub>N] and [EMIM][BF<sub>4</sub>] used in MD simulation.

| [EMIM] <sup>+</sup> |         | [Tf <sub>2</sub> N] <sup>-</sup> |         | [EMIM] <sup>+</sup> |         | [BF <sub>4</sub> ] <sup>-</sup> |         |
|---------------------|---------|----------------------------------|---------|---------------------|---------|---------------------------------|---------|
| atom                | charge  | atom                             | charge  | atom                | charge  | atom                            | charge  |
| C01                 | -0.2246 | F01                              | -0.1728 | C01                 | -0.2513 | B                               | -0.4498 |
| N02                 | -0.0230 | C02                              | 0.5374  | N02                 | 0.0421  | F                               | 0.9436  |
| C03                 | -0.0249 | F03                              | -0.1716 | C03                 | 0.0496  | F                               | -0.4428 |
| N04                 | 0.1194  | F04                              | -0.1772 | N04                 | 0.1827  | F                               | -0.4178 |
| C05                 | -0.1313 | S05                              | 0.9639  | C05                 | -0.1679 | F                               | -0.4587 |
| C06                 | 0.3152  | O06                              | -0.5536 | C06                 | 0.2867  |                                 |         |
| C07                 | -0.2936 | O07                              | -0.5815 | C07                 | -0.1740 |                                 |         |
| C08                 | -0.1028 | N08                              | -0.5672 | C08                 | -0.4094 |                                 |         |
| H09                 | 0.2236  | S09                              | 0.6765  | H09                 | 0.2291  |                                 |         |
| H0A                 | 0.2421  | O0A                              | -0.4538 | H0A                 | 0.1413  |                                 |         |
| H0B                 | 0.2103  | O0B                              | -0.3853 | H0B                 | 0.2083  |                                 |         |
| H0C                 | -0.0100 | C0C                              | 0.4946  | H0C                 | -0.0224 |                                 |         |
| H0D                 | -0.0100 | F0D                              | -0.1693 | H0D                 | -0.0224 |                                 |         |
| H0E                 | 0.0878  | F0E                              | -0.1511 | H0E                 | 0.0607  |                                 |         |
| H0F                 | 0.0878  | F0F                              | -0.1612 | H0F                 | 0.0607  |                                 |         |
| H10                 | 0.0878  |                                  |         | H10                 | 0.0607  |                                 |         |
| H11                 | 0.0952  |                                  |         | H11                 | 0.1820  |                                 |         |
| H12                 | 0.0952  |                                  |         | H12                 | 0.1820  |                                 |         |
| H13                 | 0.0952  |                                  |         | H13                 | 0.1820  |                                 |         |

**Table S5** Box size and composition of the systems in MD simulation.

| Systems                   | Size/nm     | PTO | [DEME] <sup>+</sup> | [BMIM] <sup>+</sup> | [EMIM] <sup>+</sup> | [BF <sub>4</sub> ] <sup>-</sup> | [TfO] <sup>-</sup> | [Tf <sub>2</sub> N] <sup>-</sup> |
|---------------------------|-------------|-----|---------------------|---------------------|---------------------|---------------------------------|--------------------|----------------------------------|
| [DEME][BF <sub>4</sub> ]  | 7.5×7.5×7.5 | 15  | 750                 |                     |                     |                                 | 750                |                                  |
| [BMIM][BF <sub>4</sub> ]  | 6.5×6.5×6.5 | 100 |                     |                     | 500                 |                                 | 500                |                                  |
| [BMIM][TfO]               | 7.5×7.5×7.5 | 100 |                     |                     | 750                 |                                 |                    |                                  |
| [EMIM][Tf <sub>2</sub> N] | 7.5×7.5×7.5 | 40  |                     |                     |                     | 640                             |                    | 640                              |
| [EMIM][BF <sub>4</sub> ]  | 7.0×7.0×7.0 | 20  |                     |                     |                     | 460                             | 460                |                                  |

**Table S6** Summary of  $\ln\gamma^\infty$  values for screened ionic liquids classified by anion and cation.

| anion | cation                          | $\ln\gamma^\infty$ | anion | cation                          | $\ln\gamma^\infty$ |
|-------|---------------------------------|--------------------|-------|---------------------------------|--------------------|
| TCB   | BIM                             | 0.52               | Sal   | BIM                             | -0.62              |
| TCB   | HoeMIM                          | 1.17               | Sal   | HoeMIM                          | -0.72              |
| TCB   | DDAPS                           | -0.86              | Sal   | DDAPS                           | -0.68              |
| TCB   | BomBomIM                        | -0.02              | Sal   | BomBomIM                        | -1.77              |
| TCB   | C <sub>3</sub> omBomIM          | 0.07               | Sal   | C <sub>3</sub> omBomIM          | -1.74              |
| TCB   | NomMIM                          | -0.02              | Sal   | NomMIM                          | -2.01              |
| TCB   | C <sub>7</sub> omMIM            | 0.06               | Sal   | C <sub>7</sub> omMIM            | -1.98              |
| TCB   | HomMIM                          | 0.13               | Sal   | HomMIM                          | -1.94              |
| TCB   | C <sub>18</sub> MIM             | 0.09               | Sal   | C <sub>18</sub> MIM             | -2.33              |
| TCB   | C <sub>16</sub> MIM             | 0.02               | Sal   | C <sub>16</sub> MIM             | -2.37              |
| TCB   | C <sub>14</sub> MIM             | -0.03              | Sal   | C <sub>14</sub> MIM             | -2.41              |
| TCB   | C <sub>12</sub> MIM             | -0.07              | Sal   | C <sub>12</sub> MIM             | -2.47              |
| TCB   | DMIM                            | -0.09              | Sal   | DMIM                            | -2.50              |
| TCB   | NMIM                            | -0.08              | Sal   | NMIM                            | -2.50              |
| TCB   | OMIM                            | -0.05              | Sal   | OMIM                            | -2.50              |
| TCB   | C <sub>7</sub> MIM              | -0.02              | Sal   | C <sub>7</sub> MIM              | -2.50              |
| TCB   | C <sub>5</sub> MIM              | 0.12               | Sal   | C <sub>5</sub> MIM              | -2.50              |
| TCB   | C <sub>7</sub> MIM <sub>2</sub> | 0.63               | Sal   | C <sub>7</sub> MIM <sub>2</sub> | -2.28              |
| TCB   | EMIM                            | 0.75               | Sal   | EMIM                            | -2.42              |
| TCB   | P <sub>6,6,6,14</sub>           | 0.59               | Sal   | P <sub>6,6,6,14</sub>           | -3.56              |
| TCB   | 5MEMIM                          | 0.18               | Sal   | 5MEMIM                          | -3.35              |
| TCB   | 4MEEIM                          | -0.09              | Sal   | 4MEEIM                          | -3.60              |
| TCB   | HMIM                            | 0.04               | Sal   | HMIM                            | -2.51              |
| TCB   | BMIM                            | 0.25               | Sal   | BMIM                            | -2.49              |
| TCB   | IsbMIM                          | 0.26               | Sal   | IsbMIM                          | -2.50              |
| TCB   | C <sub>3</sub> MIM              | 0.44               | Sal   | C <sub>3</sub> MIM              | -2.47              |
| TCB   | BEIM                            | 0.02               | Sal   | BEIM                            | -2.72              |

---

|      |                                 |       |     |                                 |       |
|------|---------------------------------|-------|-----|---------------------------------|-------|
| TCB  | C <sub>3</sub> EIM              | 0.13  | Sal | C <sub>3</sub> EIM              | -2.73 |
| TCB  | EEIM                            | 0.33  | Sal | EEIM                            | -2.68 |
| TCB  | BISQU                           | -0.04 | Sal | BISQU                           | -3.05 |
| TMSC | DEME                            | 0.52  | TFA | DEME                            | -3.28 |
| TMSC | BIM                             | -0.16 | TFA | BIM                             | -0.31 |
| TMSC | HoeMIM                          | -0.13 | TFA | HoeMIM                          | -0.42 |
| TMSC | DDAPS                           | -1.87 | TFA | DDAPS                           | -0.54 |
| TMSC | BomBomIM                        | 0.06  | TFA | BomBomIM                        | -1.56 |
| TMSC | C <sub>3</sub> omBomIM          | 0.05  | TFA | C <sub>3</sub> omBomIM          | -1.50 |
| TMSC | NomMIM                          | 0.12  | TFA | NomMIM                          | -1.80 |
| TMSC | C <sub>7</sub> omMIM            | 0.10  | TFA | C <sub>7</sub> omMIM            | -1.75 |
| TMSC | HomMIM                          | 0.12  | TFA | HomMIM                          | -1.71 |
| TMSC | C <sub>18</sub> MIM             | 0.51  | TFA | C <sub>18</sub> MIM             | -2.09 |
| TMSC | C <sub>16</sub> MIM             | 0.43  | TFA | C <sub>16</sub> MIM             | -2.14 |
| TMSC | C <sub>14</sub> MIM             | 0.35  | TFA | C <sub>14</sub> MIM             | -2.18 |
| TMSC | C <sub>12</sub> MIM             | 0.29  | TFA | C <sub>12</sub> MIM             | -2.24 |
| TMSC | DMIM                            | 0.22  | TFA | DMIM                            | -2.27 |
| TMSC | NMIM                            | 0.20  | TFA | NMIM                            | -2.28 |
| TMSC | OMIM                            | 0.18  | TFA | OMIM                            | -2.27 |
| TMSC | C <sub>7</sub> MIM              | 0.18  | TFA | C <sub>7</sub> MIM              | -2.27 |
| TMSC | C <sub>5</sub> MIM              | 0.19  | TFA | C <sub>5</sub> MIM              | -2.27 |
| TMSC | C <sub>7</sub> MIM <sub>2</sub> | 0.32  | TFA | C <sub>7</sub> MIM <sub>2</sub> | -2.05 |
| TMSC | EMIM                            | 0.36  | TFA | EMIM                            | -2.28 |
| TMSC | P <sub>6,6,6,14</sub>           | 0.74  | TFA | P <sub>6,6,6,14</sub>           | -2.99 |
| TMSC | 5MEMIM                          | 0.29  | TFA | 5MEMIM                          | -3.22 |
| TMSC | 4MEEIM                          | 0.22  | TFA | 4MEEIM                          | -3.44 |
| TMSC | HMIM                            | 0.06  | TFA | HMIM                            | -2.28 |
| TMSC | BMIM                            | 0.22  | TFA | BMIM                            | -2.28 |
| TMSC | IsbMIM                          | 0.25  | TFA | IsbMIM                          | -2.27 |

---

|                                  |                                 |       |                    |                                 |       |
|----------------------------------|---------------------------------|-------|--------------------|---------------------------------|-------|
| TMSC                             | C <sub>3</sub> MIM              | 0.27  | TFA                | C <sub>3</sub> MIM              | -2.27 |
| TMSC                             | BEIM                            | 0.18  | TFA                | BEIM                            | -2.50 |
| TMSC                             | C <sub>3</sub> EIM              | 0.21  | TFA                | C <sub>3</sub> EIM              | -2.53 |
| TMSC                             | EEIM                            | 0.25  | TFA                | EEIM                            | -2.52 |
| TMSC                             | BISQU                           | 0.14  | TFA                | BISQU                           | -2.81 |
| N(CF <sub>3</sub> ) <sub>2</sub> | DEME                            | 0.37  | EoeSO <sub>4</sub> | DEME                            | -2.75 |
| N(CF <sub>3</sub> ) <sub>2</sub> | BIM                             | 0.52  | EoeSO <sub>4</sub> | BIM                             | -0.94 |
| N(CF <sub>3</sub> ) <sub>2</sub> | HoeMIM                          | 1.87  | EoeSO <sub>4</sub> | HoeMIM                          | -1.23 |
| N(CF <sub>3</sub> ) <sub>2</sub> | DDAPS                           | -0.34 | EoeSO <sub>4</sub> | DDAPS                           | -0.83 |
| N(CF <sub>3</sub> ) <sub>2</sub> | BomBomIM                        | -0.01 | EoeSO <sub>4</sub> | BomBomIM                        | -1.48 |
| N(CF <sub>3</sub> ) <sub>2</sub> | C <sub>3</sub> omBomIM          | 0.08  | EoeSO <sub>4</sub> | C <sub>3</sub> omBomIM          | -1.48 |
| N(CF <sub>3</sub> ) <sub>2</sub> | NomMIM                          | -0.04 | EoeSO <sub>4</sub> | NomMIM                          | -1.59 |
| N(CF <sub>3</sub> ) <sub>2</sub> | C <sub>7</sub> omMIM            | 0.05  | EoeSO <sub>4</sub> | C <sub>7</sub> omMIM            | -1.59 |
| N(CF <sub>3</sub> ) <sub>2</sub> | HomMIM                          | 0.12  | EoeSO <sub>4</sub> | HomMIM                          | -1.59 |
| N(CF <sub>3</sub> ) <sub>2</sub> | C <sub>18</sub> MIM             | 0.10  | EoeSO <sub>4</sub> | C <sub>18</sub> MIM             | -1.73 |
| N(CF <sub>3</sub> ) <sub>2</sub> | C <sub>16</sub> MIM             | 0.03  | EoeSO <sub>4</sub> | C <sub>16</sub> MIM             | -1.79 |
| N(CF <sub>3</sub> ) <sub>2</sub> | C <sub>14</sub> MIM             | -0.04 | EoeSO <sub>4</sub> | C <sub>14</sub> MIM             | -1.84 |
| N(CF <sub>3</sub> ) <sub>2</sub> | C <sub>12</sub> MIM             | -0.08 | EoeSO <sub>4</sub> | C <sub>12</sub> MIM             | -1.90 |
| N(CF <sub>3</sub> ) <sub>2</sub> | DMIM                            | -0.10 | EoeSO <sub>4</sub> | DMIM                            | -1.95 |
| N(CF <sub>3</sub> ) <sub>2</sub> | NMIM                            | -0.09 | EoeSO <sub>4</sub> | NMIM                            | -1.97 |
| N(CF <sub>3</sub> ) <sub>2</sub> | OMIM                            | -0.06 | EoeSO <sub>4</sub> | OMIM                            | -1.99 |
| N(CF <sub>3</sub> ) <sub>2</sub> | C <sub>7</sub> MIM              | -0.02 | EoeSO <sub>4</sub> | C <sub>7</sub> MIM              | -2.02 |
| N(CF <sub>3</sub> ) <sub>2</sub> | C <sub>5</sub> MIM              | 0.17  | EoeSO <sub>4</sub> | C <sub>5</sub> MIM              | -2.10 |
| N(CF <sub>3</sub> ) <sub>2</sub> | C <sub>7</sub> MIM <sub>2</sub> | 0.88  | EoeSO <sub>4</sub> | C <sub>7</sub> MIM <sub>2</sub> | -2.07 |
| N(CF <sub>3</sub> ) <sub>2</sub> | EMIM                            | 1.04  | EoeSO <sub>4</sub> | EMIM                            | -2.29 |
| N(CF <sub>3</sub> ) <sub>2</sub> | P <sub>6,6;6,14</sub>           | 0.51  | EoeSO <sub>4</sub> | P <sub>6,6;6,14</sub>           | -1.96 |
| N(CF <sub>3</sub> ) <sub>2</sub> | 5MEMIM                          | 0.38  | EoeSO <sub>4</sub> | 5MEMIM                          | -2.87 |
| N(CF <sub>3</sub> ) <sub>2</sub> | 4MEEIM                          | 0.03  | EoeSO <sub>4</sub> | 4MEEIM                          | -3.00 |
| N(CF <sub>3</sub> ) <sub>2</sub> | HMIM                            | 0.06  | EoeSO <sub>4</sub> | HMIM                            | -2.06 |

---

|                                  |                                 |       |                    |                                 |       |
|----------------------------------|---------------------------------|-------|--------------------|---------------------------------|-------|
| N(CF <sub>3</sub> ) <sub>2</sub> | BMIM                            | 0.35  | EoeSO <sub>4</sub> | BMIM                            | -2.16 |
| N(CF <sub>3</sub> ) <sub>2</sub> | IsbMIM                          | 0.40  | EoeSO <sub>4</sub> | IsbMIM                          | -2.17 |
| N(CF <sub>3</sub> ) <sub>2</sub> | C <sub>3</sub> MIM              | 0.61  | EoeSO <sub>4</sub> | C <sub>3</sub> MIM              | -2.22 |
| N(CF <sub>3</sub> ) <sub>2</sub> | BEIM                            | 0.09  | EoeSO <sub>4</sub> | BEIM                            | -2.32 |
| N(CF <sub>3</sub> ) <sub>2</sub> | C <sub>3</sub> EIM              | 0.26  | EoeSO <sub>4</sub> | C <sub>3</sub> EIM              | -2.38 |
| N(CF <sub>3</sub> ) <sub>2</sub> | EEIM                            | 0.50  | EoeSO <sub>4</sub> | EEIM                            | -2.42 |
| N(CF <sub>3</sub> ) <sub>2</sub> | BISQU                           | -0.19 | EoeSO <sub>4</sub> | BISQU                           | -2.46 |
| Tf <sub>2</sub> N                | DEME                            | 0.12  | ESO <sub>4</sub>   | DEME                            | -3.10 |
| Tf <sub>2</sub> N                | BIM                             | 0.07  | ESO <sub>4</sub>   | BIM                             | -0.69 |
| Tf <sub>2</sub> N                | HoeMIM                          | 0.26  | ESO <sub>4</sub>   | HoeMIM                          | -1.26 |
| Tf <sub>2</sub> N                | DDAPS                           | -1.42 | ESO <sub>4</sub>   | DDAPS                           | -0.75 |
| Tf <sub>2</sub> N                | BomBomIM                        | -0.10 | ESO <sub>4</sub>   | BomBomIM                        | -1.45 |
| Tf <sub>2</sub> N                | C <sub>3</sub> omBomIM          | -0.08 | ESO <sub>4</sub>   | C <sub>3</sub> omBomIM          | -1.43 |
| Tf <sub>2</sub> N                | NomMIM                          | -0.09 | ESO <sub>4</sub>   | NomMIM                          | -1.58 |
| Tf <sub>2</sub> N                | C <sub>7</sub> omMIM            | -0.07 | ESO <sub>4</sub>   | C <sub>7</sub> omMIM            | -1.58 |
| Tf <sub>2</sub> N                | HomMIM                          | -0.04 | ESO <sub>4</sub>   | HomMIM                          | -1.56 |
| Tf <sub>2</sub> N                | C <sub>18</sub> MIM             | 0.19  | ESO <sub>4</sub>   | C <sub>18</sub> MIM             | -1.80 |
| Tf <sub>2</sub> N                | C <sub>16</sub> MIM             | 0.11  | ESO <sub>4</sub>   | C <sub>16</sub> MIM             | -1.85 |
| Tf <sub>2</sub> N                | C <sub>14</sub> MIM             | 0.03  | ESO <sub>4</sub>   | C <sub>14</sub> MIM             | -1.90 |
| Tf <sub>2</sub> N                | C <sub>12</sub> MIM             | -0.03 | ESO <sub>4</sub>   | C <sub>12</sub> MIM             | -1.96 |
| Tf <sub>2</sub> N                | DMIM                            | -0.08 | ESO <sub>4</sub>   | DMIM                            | -2.01 |
| Tf <sub>2</sub> N                | NMIM                            | -0.09 | ESO <sub>4</sub>   | NMIM                            | -2.02 |
| Tf <sub>2</sub> N                | OMIM                            | -0.10 | ESO <sub>4</sub>   | OMIM                            | -2.05 |
| Tf <sub>2</sub> N                | C <sub>7</sub> MIM              | -0.09 | ESO <sub>4</sub>   | C <sub>7</sub> MIM              | -2.07 |
| Tf <sub>2</sub> N                | C <sub>5</sub> MIM              | -0.04 | ESO <sub>4</sub>   | C <sub>5</sub> MIM              | -2.18 |
| Tf <sub>2</sub> N                | C <sub>7</sub> MIM <sub>2</sub> | 0.23  | ESO <sub>4</sub>   | C <sub>7</sub> MIM <sub>2</sub> | -2.24 |
| Tf <sub>2</sub> N                | EMIM                            | 0.27  | ESO <sub>4</sub>   | EMIM                            | -2.57 |
| Tf <sub>2</sub> N                | P <sub>6,6,6,14</sub>           | 0.99  | ESO <sub>4</sub>   | P <sub>6,6,6,14</sub>           | -2.13 |
| Tf <sub>2</sub> N                | 5MEMIM                          | 0.00  | ESO <sub>4</sub>   | 5MEMIM                          | -3.23 |

---

---

|                   |                                 |       |                      |                                 |       |
|-------------------|---------------------------------|-------|----------------------|---------------------------------|-------|
| Tf <sub>2</sub> N | 4MEEIM                          | -0.15 | ESO <sub>4</sub>     | 4MEEIM                          | -3.32 |
| Tf <sub>2</sub> N | HMIM                            | -0.07 | ESO <sub>4</sub>     | HMIM                            | -2.12 |
| Tf <sub>2</sub> N | BMIM                            | 0.02  | ESO <sub>4</sub>     | BMIM                            | -2.27 |
| Tf <sub>2</sub> N | IsbMIM                          | 0.05  | ESO <sub>4</sub>     | IsbMIM                          | -2.29 |
| Tf <sub>2</sub> N | C <sub>3</sub> MIM              | 0.12  | ESO <sub>4</sub>     | C <sub>3</sub> MIM              | -2.39 |
| Tf <sub>2</sub> N | BEIM                            | -0.09 | ESO <sub>4</sub>     | BEIM                            | -2.44 |
| Tf <sub>2</sub> N | C <sub>3</sub> EIM              | -0.04 | ESO <sub>4</sub>     | C <sub>3</sub> EIM              | -2.54 |
| Tf <sub>2</sub> N | EEIM                            | 0.05  | ESO <sub>4</sub>     | EEIM                            | -2.64 |
| Tf <sub>2</sub> N | BISQU                           | -0.20 | ESO <sub>4</sub>     | BISQU                           | -2.57 |
| Tf <sub>2</sub> C | DEME                            | -0.01 | MoeoeSO <sub>4</sub> | DEME                            | -2.96 |
| Tf <sub>2</sub> C | BIM                             | 0.10  | MoeoeSO <sub>4</sub> | BIM                             | -1.27 |
| Tf <sub>2</sub> C | HoeMIM                          | 0.28  | MoeoeSO <sub>4</sub> | HoeMIM                          | -1.61 |
| Tf <sub>2</sub> C | DDAPS                           | -1.19 | MoeoeSO <sub>4</sub> | DDAPS                           | -1.01 |
| Tf <sub>2</sub> C | BomBomIM                        | -0.17 | MoeoeSO <sub>4</sub> | BomBomIM                        | -1.67 |
| Tf <sub>2</sub> C | C <sub>3</sub> omBomIM          | -0.15 | MoeoeSO <sub>4</sub> | C <sub>3</sub> omBomIM          | -1.69 |
| Tf <sub>2</sub> C | NomMIM                          | -0.17 | MoeoeSO <sub>4</sub> | NomMIM                          | -1.77 |
| Tf <sub>2</sub> C | C <sub>7</sub> omMIM            | -0.15 | MoeoeSO <sub>4</sub> | C <sub>7</sub> omMIM            | -1.79 |
| Tf <sub>2</sub> C | HomMIM                          | -0.13 | MoeoeSO <sub>4</sub> | HomMIM                          | -1.80 |
| Tf <sub>2</sub> C | C <sub>18</sub> MIM             | 0.06  | MoeoeSO <sub>4</sub> | C <sub>18</sub> MIM             | -1.90 |
| Tf <sub>2</sub> C | C <sub>16</sub> MIM             | -0.02 | MoeoeSO <sub>4</sub> | C <sub>16</sub> MIM             | -1.95 |
| Tf <sub>2</sub> C | C <sub>14</sub> MIM             | -0.09 | MoeoeSO <sub>4</sub> | C <sub>14</sub> MIM             | -2.01 |
| Tf <sub>2</sub> C | C <sub>12</sub> MIM             | -0.14 | MoeoeSO <sub>4</sub> | C <sub>12</sub> MIM             | -2.07 |
| Tf <sub>2</sub> C | DMIM                            | -0.19 | MoeoeSO <sub>4</sub> | DMIM                            | -2.13 |
| Tf <sub>2</sub> C | NMIM                            | -0.20 | MoeoeSO <sub>4</sub> | NMIM                            | -2.15 |
| Tf <sub>2</sub> C | OMIM                            | -0.21 | MoeoeSO <sub>4</sub> | OMIM                            | -2.18 |
| Tf <sub>2</sub> C | C <sub>7</sub> MIM              | -0.20 | MoeoeSO <sub>4</sub> | C <sub>7</sub> MIM              | -2.22 |
| Tf <sub>2</sub> C | C <sub>5</sub> MIM              | -0.15 | MoeoeSO <sub>4</sub> | C <sub>5</sub> MIM              | -2.33 |
| Tf <sub>2</sub> C | C <sub>7</sub> MIM <sub>2</sub> | 0.12  | MoeoeSO <sub>4</sub> | C <sub>7</sub> MIM <sub>2</sub> | -2.34 |
| Tf <sub>2</sub> C | EMIM                            | 0.15  | MoeoeSO <sub>4</sub> | EMIM                            | -2.57 |

---

---

|                   |                        |       |                      |                        |       |
|-------------------|------------------------|-------|----------------------|------------------------|-------|
| Tf <sub>2</sub> C | P <sub>6,6;6,14</sub>  | 0.74  | MoeoeSO <sub>4</sub> | P <sub>6,6;6,14</sub>  | -2.13 |
| Tf <sub>2</sub> C | 5MEMIM                 | -0.14 | MoeoeSO <sub>4</sub> | 5MEMIM                 | -3.10 |
| Tf <sub>2</sub> C | 4MEEIM                 | -0.30 | MoeoeSO <sub>4</sub> | 4MEEIM                 | -3.20 |
| Tf <sub>2</sub> C | HMIM                   | -0.18 | MoeoeSO <sub>4</sub> | HMIM                   | -2.27 |
| Tf <sub>2</sub> C | BMIM                   | -0.09 | MoeoeSO <sub>4</sub> | BMIM                   | -2.40 |
| Tf <sub>2</sub> C | IsbMIM                 | -0.06 | MoeoeSO <sub>4</sub> | IsbMIM                 | -2.42 |
| Tf <sub>2</sub> C | C <sub>3</sub> MIM     | 0.01  | MoeoeSO <sub>4</sub> | C <sub>3</sub> MIM     | -2.48 |
| Tf <sub>2</sub> C | BEIM                   | -0.20 | MoeoeSO <sub>4</sub> | BEIM                   | -2.53 |
| Tf <sub>2</sub> C | C <sub>3</sub> EIM     | -0.15 | MoeoeSO <sub>4</sub> | C <sub>3</sub> EIM     | -2.62 |
| Tf <sub>2</sub> C | EEIM                   | -0.06 | MoeoeSO <sub>4</sub> | EEIM                   | -2.68 |
| Tf <sub>2</sub> C | BISQU                  | -0.34 | MoeoeSO <sub>4</sub> | BISQU                  | -2.65 |
| BF <sub>4</sub>   | DEME                   | -1.19 | MoeSO <sub>4</sub>   | DEME                   | -2.95 |
| BF <sub>4</sub>   | BIM                    | 1.08  | MoeSO <sub>4</sub>   | BIM                    | -0.87 |
| BF <sub>4</sub>   | HoeMIM                 | 0.74  | MoeSO <sub>4</sub>   | HoeMIM                 | -1.35 |
| BF <sub>4</sub>   | DDAPS                  | -0.52 | MoeSO <sub>4</sub>   | DDAPS                  | -0.83 |
| BF <sub>4</sub>   | BomBomIM               | -0.26 | MoeSO <sub>4</sub>   | BomBomIM               | -1.47 |
| BF <sub>4</sub>   | C <sub>3</sub> omBomIM | -0.12 | MoeSO <sub>4</sub>   | C <sub>3</sub> omBomIM | -1.47 |
| BF <sub>4</sub>   | NomMIM                 | -0.33 | MoeSO <sub>4</sub>   | NomMIM                 | -1.59 |
| BF <sub>4</sub>   | C <sub>7</sub> omMIM   | -0.19 | MoeSO <sub>4</sub>   | C <sub>7</sub> omMIM   | -1.59 |
| BF <sub>4</sub>   | HomMIM                 | -0.09 | MoeSO <sub>4</sub>   | HomMIM                 | -1.58 |
| BF <sub>4</sub>   | C <sub>18</sub> MIM    | -0.49 | MoeSO <sub>4</sub>   | C <sub>18</sub> MIM    | -1.76 |
| BF <sub>4</sub>   | C <sub>16</sub> MIM    | -0.54 | MoeSO <sub>4</sub>   | C <sub>16</sub> MIM    | -1.81 |
| BF <sub>4</sub>   | C <sub>14</sub> MIM    | -0.58 | MoeSO <sub>4</sub>   | C <sub>14</sub> MIM    | -1.86 |
| BF <sub>4</sub>   | C <sub>12</sub> MIM    | -0.60 | MoeSO <sub>4</sub>   | C <sub>12</sub> MIM    | -1.92 |
| BF <sub>4</sub>   | DMIM                   | -0.60 | MoeSO <sub>4</sub>   | DMIM                   | -1.97 |
| BF <sub>4</sub>   | NMIM                   | -0.57 | MoeSO <sub>4</sub>   | NMIM                   | -1.99 |
| BF <sub>4</sub>   | OMIM                   | -0.55 | MoeSO <sub>4</sub>   | OMIM                   | -2.01 |
| BF <sub>4</sub>   | C <sub>7</sub> MIM     | -0.51 | MoeSO <sub>4</sub>   | C <sub>7</sub> MIM     | -2.04 |
| BF <sub>4</sub>   | C <sub>5</sub> MIM     | -0.45 | MoeSO <sub>4</sub>   | C <sub>5</sub> MIM     | -2.16 |

---

---

|                 |                                 |       |                    |                                 |       |
|-----------------|---------------------------------|-------|--------------------|---------------------------------|-------|
| BF <sub>4</sub> | C <sub>7</sub> MIM <sub>2</sub> | -0.31 | MoeSO <sub>4</sub> | C <sub>7</sub> MIM <sub>2</sub> | -2.20 |
| BF <sub>4</sub> | EMIM                            | -0.67 | MoeSO <sub>4</sub> | EMIM                            | -2.49 |
| BF <sub>4</sub> | P <sub>6,6;6,14</sub>           | -0.11 | MoeSO <sub>4</sub> | P <sub>6,6;6,14</sub>           | -2.01 |
| BF <sub>4</sub> | 5MEMIM                          | -1.38 | MoeSO <sub>4</sub> | 5MEMIM                          | -3.09 |
| BF <sub>4</sub> | 4MEEIM                          | -1.47 | MoeSO <sub>4</sub> | 4MEEIM                          | -3.18 |
| BF <sub>4</sub> | HMIM                            | -0.47 | MoeSO <sub>4</sub> | HMIM                            | -2.10 |
| BF <sub>4</sub> | BMIM                            | -0.43 | MoeSO <sub>4</sub> | BMIM                            | -2.24 |
| BF <sub>4</sub> | IsbMIM                          | -0.42 | MoeSO <sub>4</sub> | IsbMIM                          | -2.26 |
| BF <sub>4</sub> | C <sub>3</sub> MIM              | -0.46 | MoeSO <sub>4</sub> | C <sub>3</sub> MIM              | -2.35 |
| BF <sub>4</sub> | BEIM                            | -0.69 | MoeSO <sub>4</sub> | BEIM                            | -2.39 |
| BF <sub>4</sub> | C <sub>3</sub> EIM              | -0.72 | MoeSO <sub>4</sub> | C <sub>3</sub> EIM              | -2.49 |
| BF <sub>4</sub> | EEIM                            | -0.77 | MoeSO <sub>4</sub> | EEIM                            | -2.58 |
| BF <sub>4</sub> | BISQU                           | -0.85 | MoeSO <sub>4</sub> | BISQU                           | -2.52 |
| TCM             | DEME                            | -0.75 | DEP                | DEME                            | -5.35 |
| TCM             | BIM                             | 0.69  | DEP                | BIM                             | -2.51 |
| TCM             | HoeMIM                          | 1.28  | DEP                | HoeMIM                          | -3.00 |
| TCM             | DDAPS                           | -0.41 | DEP                | DDAPS                           | -1.72 |
| TCM             | BomBomIM                        | -0.32 | DEP                | BomBomIM                        | -3.05 |
| TCM             | C <sub>3</sub> omBomIM          | -0.22 | DEP                | C <sub>3</sub> omBomIM          | -3.09 |
| TCM             | NomMIM                          | -0.38 | DEP                | NomMIM                          | -3.34 |
| TCM             | C <sub>7</sub> omMIM            | -0.28 | DEP                | C <sub>7</sub> omMIM            | -3.38 |
| TCM             | HomMIM                          | -0.20 | DEP                | HomMIM                          | -3.41 |
| TCM             | C <sub>18</sub> MIM             | -0.46 | DEP                | C <sub>18</sub> MIM             | -3.72 |
| TCM             | C <sub>16</sub> MIM             | -0.51 | DEP                | C <sub>16</sub> MIM             | -3.77 |
| TCM             | C <sub>14</sub> MIM             | -0.56 | DEP                | C <sub>14</sub> MIM             | -3.83 |
| TCM             | C <sub>12</sub> MIM             | -0.59 | DEP                | C <sub>12</sub> MIM             | -3.91 |
| TCM             | DMIM                            | -0.59 | DEP                | DMIM                            | -3.98 |
| TCM             | NMIM                            | -0.57 | DEP                | NMIM                            | -4.01 |
| TCM             | OMIM                            | -0.54 | DEP                | OMIM                            | -4.05 |

---

---

|     |                                 |       |     |                                 |       |
|-----|---------------------------------|-------|-----|---------------------------------|-------|
| TCM | C <sub>7</sub> MIM              | -0.50 | DEP | C <sub>7</sub> MIM              | -4.10 |
| TCM | C <sub>5</sub> MIM              | -0.36 | DEP | C <sub>5</sub> MIM              | -4.25 |
| TCM | C <sub>7</sub> MIM <sub>2</sub> | 0.15  | DEP | C <sub>7</sub> MIM <sub>2</sub> | -4.27 |
| TCM | EMIM                            | 0.20  | DEP | EMIM                            | -4.57 |
| TCM | P <sub>6,6,6,14</sub>           | -0.41 | DEP | P <sub>6,6,6,14</sub>           | -5.01 |
| TCM | 5MEMIM                          | -0.62 | DEP | 5MEMIM                          | -5.44 |
| TCM | 4MEEIM                          | -0.92 | DEP | 4MEEIM                          | -5.63 |
| TCM | HMIM                            | -0.44 | DEP | HMIM                            | -4.18 |
| TCM | BMIM                            | -0.25 | DEP | BMIM                            | -4.35 |
| TCM | IsbMIM                          | -0.24 | DEP | IsbMIM                          | -4.37 |
| TCM | C <sub>3</sub> MIM              | -0.07 | DEP | C <sub>3</sub> MIM              | -4.45 |
| TCM | BEIM                            | -0.54 | DEP | BEIM                            | -4.53 |
| TCM | C <sub>3</sub> EIM              | -0.44 | DEP | C <sub>3</sub> EIM              | -4.63 |
| TCM | EEIM                            | -0.26 | DEP | EEIM                            | -4.68 |
| TCM | BISQU                           | -0.69 | DEP | BISQU                           | -4.72 |
| TFO | DEME                            | -1.38 | DMP | DEME                            | -5.70 |
| TFO | BIM                             | 0.24  | DMP | BIM                             | -2.40 |
| TFO | HoeMIM                          | 0.47  | DMP | HoeMIM                          | -3.36 |
| TFO | DDAPS                           | -0.60 | DMP | DDAPS                           | -1.58 |
| TFO | BomBomIM                        | -0.71 | DMP | BomBomIM                        | -2.97 |
| TFO | C <sub>3</sub> omBomIM          | -0.65 | DMP | C <sub>3</sub> omBomIM          | -3.02 |
| TFO | NomMIM                          | -0.81 | DMP | NomMIM                          | -3.27 |
| TFO | C <sub>7</sub> omMIM            | -0.75 | DMP | C <sub>7</sub> omMIM            | -3.33 |
| TFO | HomMIM                          | -0.70 | DMP | HomMIM                          | -3.36 |
| TFO | C <sub>18</sub> MIM             | -0.86 | DMP | C <sub>18</sub> MIM             | -3.64 |
| TFO | C <sub>16</sub> MIM             | -0.92 | DMP | C <sub>16</sub> MIM             | -3.70 |
| TFO | C <sub>14</sub> MIM             | -0.98 | DMP | C <sub>14</sub> MIM             | -3.75 |
| TFO | C <sub>12</sub> MIM             | -1.03 | DMP | C <sub>12</sub> MIM             | -3.84 |
| TFO | DMIM                            | -1.06 | DMP | DMIM                            | -3.92 |

---

---

|     |                                 |       |     |                                 |       |
|-----|---------------------------------|-------|-----|---------------------------------|-------|
| TFO | NMIM                            | -1.06 | DMP | NMIM                            | -3.97 |
| TFO | OMIM                            | -1.07 | DMP | OMIM                            | -4.02 |
| TFO | C <sub>7</sub> MIM              | -1.05 | DMP | C <sub>7</sub> MIM              | -4.09 |
| TFO | C <sub>5</sub> MIM              | -1.00 | DMP | C <sub>5</sub> MIM              | -4.33 |
| TFO | C <sub>7</sub> MIM <sub>2</sub> | -0.63 | DMP | C <sub>7</sub> MIM <sub>2</sub> | -4.56 |
| TFO | EMIM                            | -0.73 | DMP | EMIM                            | -5.01 |
| TFO | P <sub>6,6,6,14</sub>           | -0.76 | DMP | P <sub>6,6,6,14</sub>           | -4.89 |
| TFO | 5MEMIM                          | -1.44 | DMP | 5MEMIM                          | -5.82 |
| TFO | 4MEEIM                          | -1.47 | DMP | 4MEEIM                          | -5.90 |
| TFO | HMIM                            | -1.03 | DMP | HMIM                            | -4.21 |
| TFO | BMIM                            | -0.94 | DMP | BMIM                            | -4.50 |
| TFO | IsbMIM                          | -0.91 | DMP | IsbMIM                          | -4.54 |
| TFO | C <sub>3</sub> MIM              | -0.84 | DMP | C <sub>3</sub> MIM              | -4.72 |
| TFO | BEIM                            | -1.16 | DMP | BEIM                            | -4.62 |
| TFO | C <sub>3</sub> EIM              | -1.12 | DMP | C <sub>3</sub> EIM              | -4.80 |
| TFO | EEIM                            | -1.04 | DMP | EEIM                            | -4.97 |
| TFO | BISQU                           | -1.37 | DMP | BISQU                           | -4.77 |
| DCA | DEME                            | -2.38 | Bza | DEME                            | -5.94 |
| DCA | BIM                             | 0.53  | Bza | BIM                             | -2.01 |
| DCA | HoeMIM                          | 0.36  | Bza | HoeMIM                          | -2.65 |
| DCA | DDAPS                           | -0.20 | Bza | DDAPS                           | -1.56 |
| DCA | BomBomIM                        | -0.87 | Bza | BomBomIM                        | -3.04 |
| DCA | C <sub>3</sub> omBomIM          | -0.76 | Bza | C <sub>3</sub> omBomIM          | -3.05 |
| DCA | NomMIM                          | -1.02 | Bza | NomMIM                          | -3.41 |
| DCA | C <sub>7</sub> omMIM            | -0.92 | Bza | C <sub>7</sub> omMIM            | -3.43 |
| DCA | HomMIM                          | -0.84 | Bza | HomMIM                          | -3.44 |
| DCA | C <sub>18</sub> MIM             | -1.33 | Bza | C <sub>18</sub> MIM             | -3.91 |
| DCA | C <sub>16</sub> MIM             | -1.37 | Bza | C <sub>16</sub> MIM             | -3.96 |
| DCA | C <sub>14</sub> MIM             | -1.40 | Bza | C <sub>14</sub> MIM             | -4.00 |

---

---

|                    |                                 |       |     |                                 |       |
|--------------------|---------------------------------|-------|-----|---------------------------------|-------|
| DCA                | C <sub>12</sub> MIM             | -1.42 | Bza | C <sub>12</sub> MIM             | -4.08 |
| DCA                | DMIM                            | -1.42 | Bza | DMIM                            | -4.13 |
| DCA                | NMIM                            | -1.41 | Bza | NMIM                            | -4.16 |
| DCA                | OMIM                            | -1.38 | Bza | OMIM                            | -4.18 |
| DCA                | C <sub>7</sub> MIM              | -1.35 | Bza | C <sub>7</sub> MIM              | -4.21 |
| DCA                | C <sub>5</sub> MIM              | -1.30 | Bza | C <sub>5</sub> MIM              | -4.34 |
| DCA                | C <sub>7</sub> MIM <sub>2</sub> | -1.10 | Bza | C <sub>7</sub> MIM <sub>2</sub> | -4.34 |
| DCA                | EMIM                            | -1.33 | Bza | EMIM                            | -4.64 |
| DCA                | P <sub>6,6,6,14</sub>           | -1.94 | Bza | P <sub>6,6,6,14</sub>           | -5.98 |
| DCA                | 5MEMIM                          | -2.27 | Bza | 5MEMIM                          | -5.73 |
| DCA                | 4MEEIM                          | -2.46 | Bza | 4MEEIM                          | -5.93 |
| DCA                | HMIM                            | -1.33 | Bza | HMIM                            | -4.29 |
| DCA                | BMIM                            | -1.29 | Bza | BMIM                            | -4.43 |
| DCA                | IsbMIM                          | -1.31 | Bza | IsbMIM                          | -4.46 |
| DCA                | C <sub>3</sub> MIM              | -1.29 | Bza | C <sub>3</sub> MIM              | -4.53 |
| DCA                | BEIM                            | -1.57 | Bza | BEIM                            | -4.62 |
| DCA                | C <sub>3</sub> EIM              | -1.59 | Bza | C <sub>3</sub> EIM              | -4.71 |
| DCA                | EEIM                            | -1.58 | Bza | EEIM                            | -4.76 |
| DCA                | BISQU                           | -1.80 | Bza | BISQU                           | -4.94 |
| F <sub>7</sub> Bta | DEME                            | -2.70 | DBP | DEME                            | -4.84 |
| F <sub>7</sub> Bta | BIM                             | -0.43 | DBP | BIM                             | -2.47 |
| F <sub>7</sub> Bta | HoeMIM                          | -0.46 | DBP | HoeMIM                          | -2.71 |
| F <sub>7</sub> Bta | DDAPS                           | -0.57 | DBP | DDAPS                           | -1.75 |
| F <sub>7</sub> Bta | BomBomIM                        | -1.41 | DBP | BomBomIM                        | -2.95 |
| F <sub>7</sub> Bta | C <sub>3</sub> omBomIM          | -1.39 | DBP | C <sub>3</sub> omBomIM          | -2.98 |
| F <sub>7</sub> Bta | NomMIM                          | -1.63 | DBP | NomMIM                          | -3.22 |
| F <sub>7</sub> Bta | C <sub>7</sub> omMIM            | -1.61 | DBP | C <sub>7</sub> omMIM            | -3.25 |
| F <sub>7</sub> Bta | HomMIM                          | -1.59 | DBP | HomMIM                          | -3.27 |
| F <sub>7</sub> Bta | C <sub>18</sub> MIM             | -1.81 | DBP | C <sub>18</sub> MIM             | -3.58 |

---

---

|                    |                                 |       |     |                                 |       |
|--------------------|---------------------------------|-------|-----|---------------------------------|-------|
| F <sub>7</sub> Bta | C <sub>16</sub> MIM             | -1.86 | DBP | C <sub>16</sub> MIM             | -3.63 |
| F <sub>7</sub> Bta | C <sub>14</sub> MIM             | -1.91 | DBP | C <sub>14</sub> MIM             | -3.68 |
| F <sub>7</sub> Bta | C <sub>12</sub> MIM             | -1.98 | DBP | C <sub>12</sub> MIM             | -3.75 |
| F <sub>7</sub> Bta | DMIM                            | -2.02 | DBP | DMIM                            | -3.81 |
| F <sub>7</sub> Bta | NMIM                            | -2.02 | DBP | NMIM                            | -3.84 |
| F <sub>7</sub> Bta | OMIM                            | -2.03 | DBP | OMIM                            | -3.86 |
| F <sub>7</sub> Bta | C <sub>7</sub> MIM              | -2.02 | DBP | C <sub>7</sub> MIM              | -3.89 |
| F <sub>7</sub> Bta | C <sub>5</sub> MIM              | -2.01 | DBP | C <sub>5</sub> MIM              | -3.98 |
| F <sub>7</sub> Bta | C <sub>7</sub> MIM <sub>2</sub> | -1.76 | DBP | C <sub>7</sub> MIM <sub>2</sub> | -3.89 |
| F <sub>7</sub> Bta | EMIM                            | -1.83 | DBP | EMIM                            | -4.07 |
| F <sub>7</sub> Bta | P <sub>6,6,6,14</sub>           | -2.63 | DBP | P <sub>6,6,6,14</sub>           | -4.87 |
| F <sub>7</sub> Bta | 5MEMIM                          | -2.60 | DBP | 5MEMIM                          | -4.89 |
| F <sub>7</sub> Bta | 4MEEIM                          | -2.85 | DBP | 4MEEIM                          | -5.13 |
| F <sub>7</sub> Bta | HMIM                            | -2.03 | DBP | HMIM                            | -3.94 |
| F <sub>7</sub> Bta | BMIM                            | -1.98 | DBP | BMIM                            | -4.02 |
| F <sub>7</sub> Bta | IsbMIM                          | -1.96 | DBP | IsbMIM                          | -4.03 |
| F <sub>7</sub> Bta | C <sub>3</sub> MIM              | -1.92 | DBP | C <sub>3</sub> MIM              | -4.06 |
| F <sub>7</sub> Bta | BEIM                            | -2.16 | DBP | BEIM                            | -4.22 |
| F <sub>7</sub> Bta | C <sub>3</sub> EIM              | -2.14 | DBP | C <sub>3</sub> EIM              | -4.26 |
| F <sub>7</sub> Bta | EEIM                            | -2.08 | DBP | EEIM                            | -4.25 |
| F <sub>7</sub> Bta | BISQU                           | -2.50 | DBP | BISQU                           | -4.45 |
| MSO <sub>4</sub>   | DEME                            | -3.28 | Ac  | DEME                            | -8.01 |
| MSO <sub>4</sub>   | BIM                             | -0.46 | Ac  | BIM                             | -3.14 |
| MSO <sub>4</sub>   | HoeMIM                          | -1.44 | Ac  | HoeMIM                          | -5.24 |
| MSO <sub>4</sub>   | DDAPS                           | -0.65 | Ac  | DDAPS                           | -2.05 |
| MSO <sub>4</sub>   | BomBomIM                        | -1.35 | Ac  | BomBomIM                        | -3.79 |
| MSO <sub>4</sub>   | C <sub>3om</sub> BomIM          | -1.32 | Ac  | C <sub>3om</sub> BomIM          | -3.89 |
| MSO <sub>4</sub>   | NomMIM                          | -1.49 | Ac  | NomMIM                          | -4.26 |
| MSO <sub>4</sub>   | C <sub>7om</sub> MIM            | -1.47 | Ac  | C <sub>7om</sub> MIM            | -4.39 |

---

---

|                  |                                 |       |    |                                 |       |
|------------------|---------------------------------|-------|----|---------------------------------|-------|
| MSO <sub>4</sub> | HomMIM                          | -1.45 | Ac | HomMIM                          | -4.48 |
| MSO <sub>4</sub> | C <sub>18</sub> MIM             | -1.74 | Ac | C <sub>18</sub> MIM             | -4.77 |
| MSO <sub>4</sub> | C <sub>16</sub> MIM             | -1.79 | Ac | C <sub>16</sub> MIM             | -4.83 |
| MSO <sub>4</sub> | C <sub>14</sub> MIM             | -1.83 | Ac | C <sub>14</sub> MIM             | -4.90 |
| MSO <sub>4</sub> | C <sub>12</sub> MIM             | -1.88 | Ac | C <sub>12</sub> MIM             | -5.01 |
| MSO <sub>4</sub> | DMIM                            | -1.92 | Ac | DMIM                            | -5.14 |
| MSO <sub>4</sub> | NMIM                            | -1.94 | Ac | NMIM                            | -5.21 |
| MSO <sub>4</sub> | OMIM                            | -1.96 | Ac | OMIM                            | -5.29 |
| MSO <sub>4</sub> | C <sub>7</sub> MIM              | -1.99 | Ac | C <sub>7</sub> MIM              | -5.41 |
| MSO <sub>4</sub> | C <sub>5</sub> MIM              | -2.14 | Ac | C <sub>5</sub> MIM              | -5.83 |
| MSO <sub>4</sub> | C <sub>7</sub> MIM <sub>2</sub> | -2.35 | Ac | C <sub>7</sub> MIM <sub>2</sub> | -6.46 |
| MSO <sub>4</sub> | EMIM                            | -2.81 | Ac | EMIM                            | -7.24 |
| MSO <sub>4</sub> | P <sub>6,6,6,14</sub>           | -2.06 | Ac | P <sub>6,6,6,14</sub>           | -7.05 |
| MSO <sub>4</sub> | 5MEMIM                          | -3.43 | Ac | 5MEMIM                          | -8.11 |
| MSO <sub>4</sub> | 4MEEIM                          | -3.44 | Ac | 4MEEIM                          | -8.02 |
| MSO <sub>4</sub> | HMIM                            | -2.06 | Ac | HMIM                            | -5.62 |
| MSO <sub>4</sub> | BMIM                            | -2.27 | Ac | BMIM                            | -6.16 |
| MSO <sub>4</sub> | IsbMIM                          | -2.31 | Ac | IsbMIM                          | -6.23 |
| MSO <sub>4</sub> | C <sub>3</sub> MIM              | -2.48 | Ac | C <sub>3</sub> MIM              | -6.60 |
| MSO <sub>4</sub> | BEIM                            | -2.41 | Ac | BEIM                            | -6.14 |
| MSO <sub>4</sub> | C <sub>3</sub> EIM              | -2.58 | Ac | C <sub>3</sub> EIM              | -6.47 |
| MSO <sub>4</sub> | EEIM                            | -2.75 | Ac | EEIM                            | -6.83 |
| MSO <sub>4</sub> | BISQU                           | -2.53 | Ac | BISQU                           | -6.33 |
| Sal              | DEME                            | -3.56 |    |                                 |       |

---

**Table S7** Ratio of IC<sub>50</sub> to effective IL concentration in BHK 21 cells.

| ILs                       | IL <sub>eff</sub> (μM) | IC <sub>50</sub> (μM) | IC <sub>50</sub> /IL <sub>eff</sub> |
|---------------------------|------------------------|-----------------------|-------------------------------------|
| [DEME][BF <sub>4</sub> ]  | 213                    | 1010                  | 5                                   |
| [EMIM][BF <sub>4</sub> ]  | 606                    | 780                   | 1                                   |
| [BMIM][TfO]               | 86                     | 680                   | 8                                   |
| [BMIM][BF <sub>4</sub> ]  | 156                    | 370                   | 2                                   |
| [EMIM][Tf <sub>2</sub> N] | 293                    | 260                   | 1                                   |

IL<sub>eff</sub>: Effective concentration of ILs at the MIC of PTO.

**Table S8** Ratio of IC<sub>50</sub> to effective concentration of IL in HepG2 cells

| ILs                       | IL <sub>eff.</sub> (μM) | IC <sub>50</sub> (μM) | IC <sub>50</sub> /IL <sub>eff.</sub> |
|---------------------------|-------------------------|-----------------------|--------------------------------------|
| [DEME][BF <sub>4</sub> ]  | 213                     | 400                   | 2                                    |
| [EMIM][BF <sub>4</sub> ]  | 606                     | 2200                  | 4                                    |
| [BMIM][TfO]               | 86                      | 870                   | 10                                   |
| [BMIM][BF <sub>4</sub> ]  | 156                     | 2000                  | 13                                   |
| [EMIM][Tf <sub>2</sub> N] | 293                     | 360                   | 1                                    |

IL<sub>eff.</sub>: Effective concentration of ILs at the MIC of PTO.

**Table S9** Comparison of Simulated and Experimental Densities for Pure ILs at 338.15 K

| ILs                       | $\rho_{\text{sim}}/(\text{kg}/\text{m}^3)$ | $\rho_{\text{ref}}/(\text{kg}/\text{m}^3)$ | ARD (%) |
|---------------------------|--------------------------------------------|--------------------------------------------|---------|
| [DEME][BF <sub>4</sub> ]  | 1153                                       | 1106                                       | 4.25    |
| [BMIM][BF <sub>4</sub> ]  | 1176                                       | 1145                                       | 2.71    |
| [BMIM][TfO]               | 1269                                       | 1282                                       | 1.01    |
| [EMIM][Tf <sub>2</sub> N] | 1474                                       | 1439                                       | 2.43    |
| [EMIM][BF <sub>4</sub> ]  | 1256                                       | 1248                                       | 0.64    |

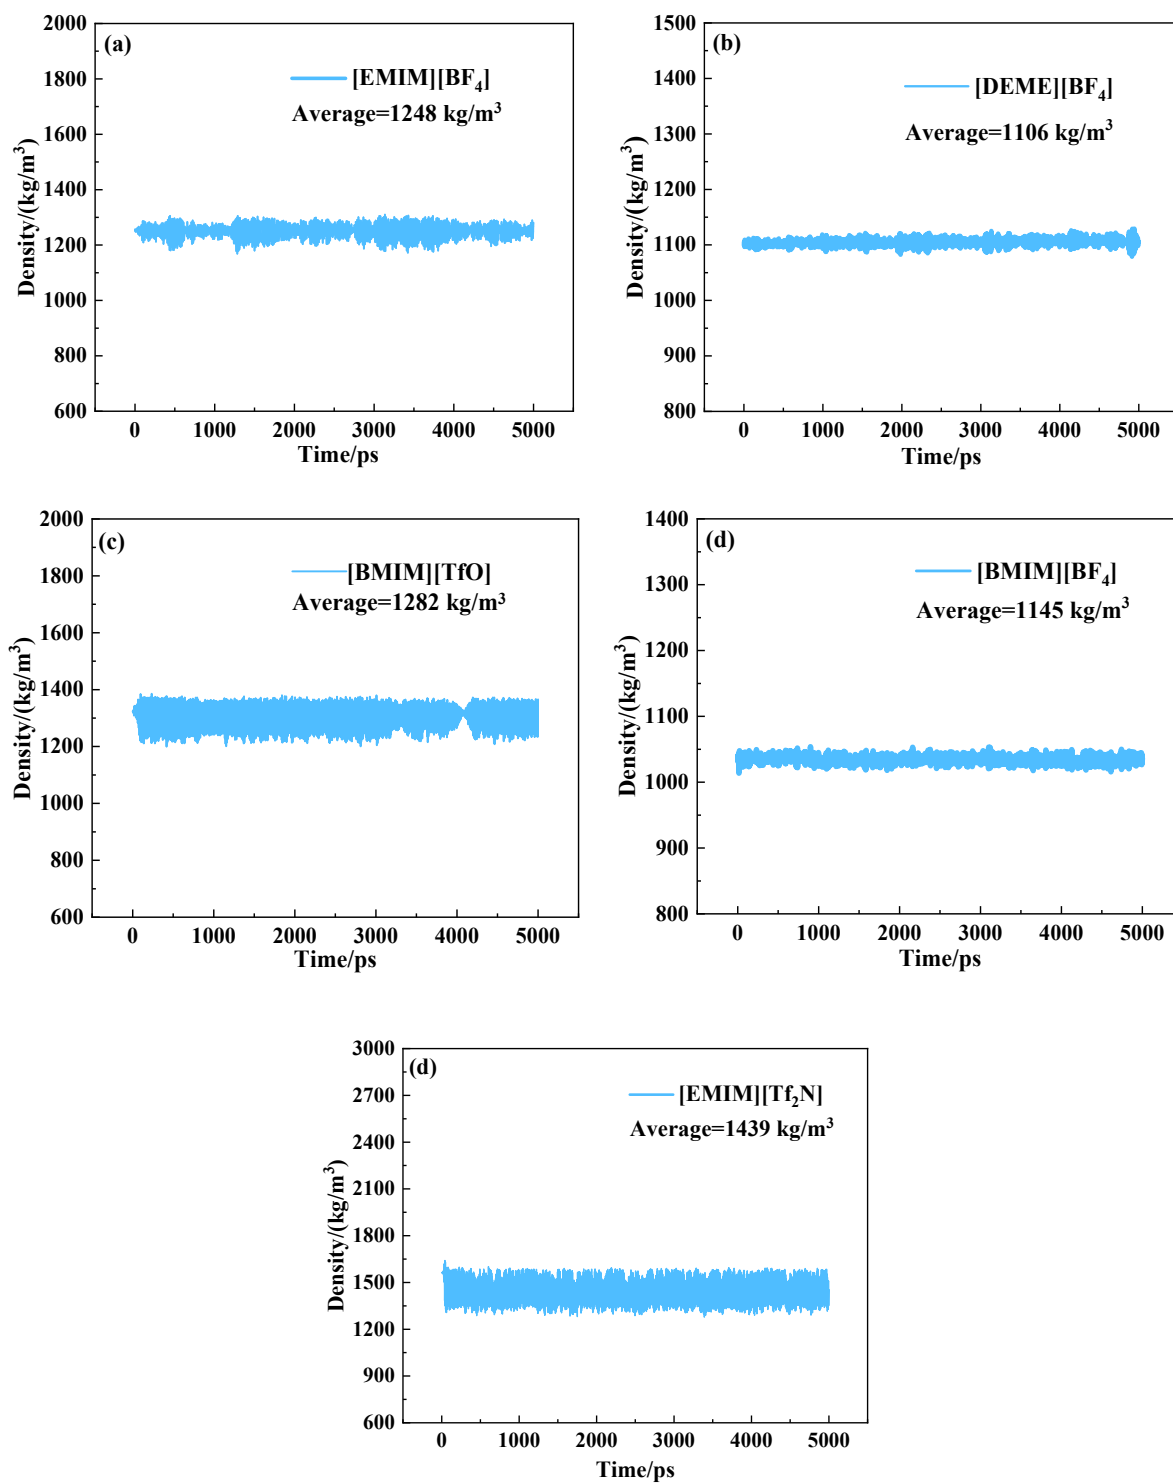

Fig. S1 The density of five IL-PTO systems calculated from the last 5 ns of the MD simulation trajectory.

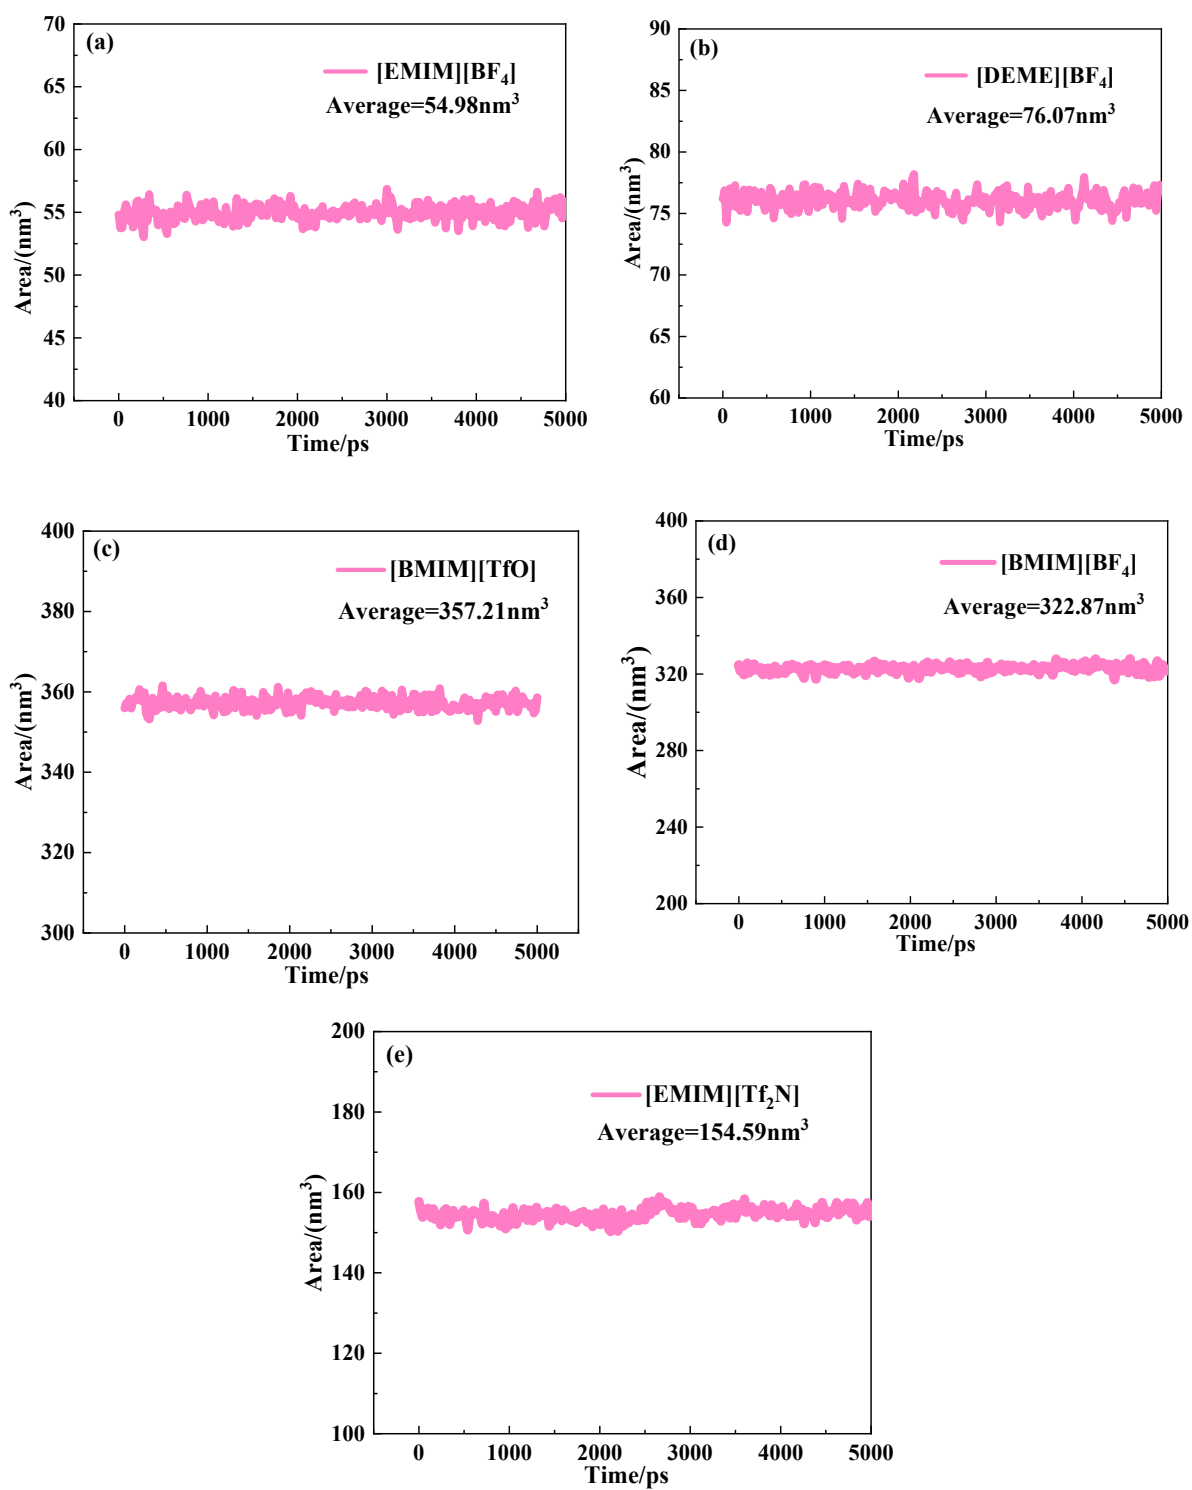

**Fig. S2** The solvent-accessible surface area (SASA) of PTO in five IL-PTO systems, calculated from the last 5 ns of the MD simulation trajectory.

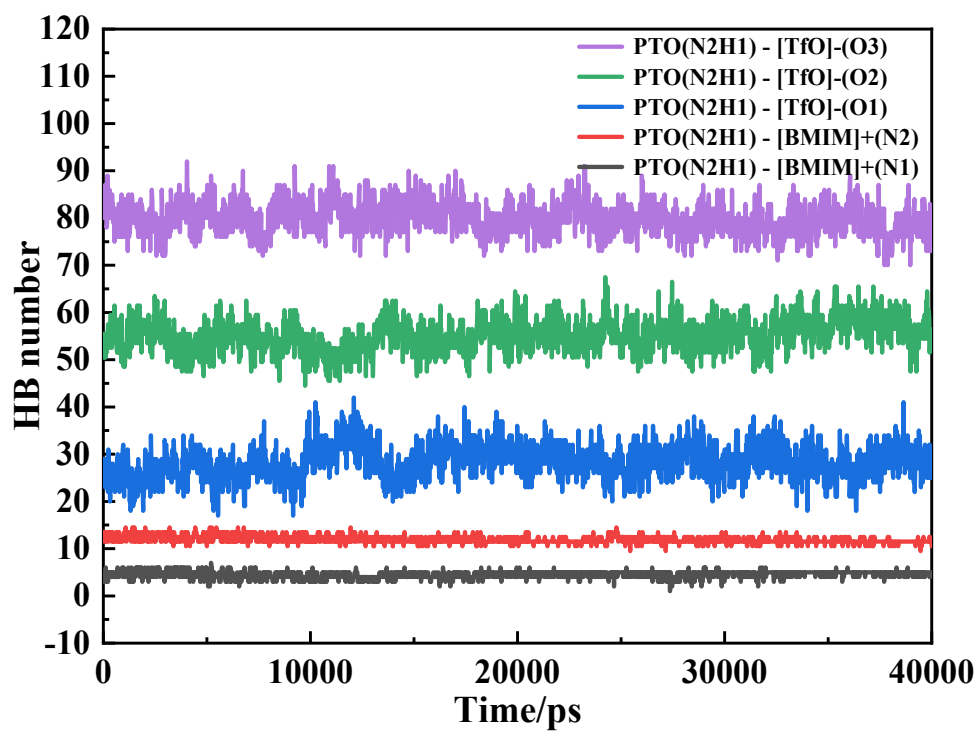

Fig. S3 Time evolution of the number of HBs during the 40 ns MD simulation.
